# Supplementary material for: Fanconi anemia genes in lung adenocarcinoma- a pathway-wide study on cancer susceptibility
Source: PubMed Central journal article supplement (PMC4739091; doi:10.1186/s12929-016-0240-9), 2016-02-03

Supplementary Figure 3

**Male Controls**

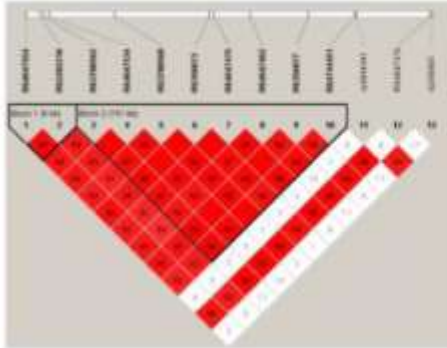

**Male Cases**

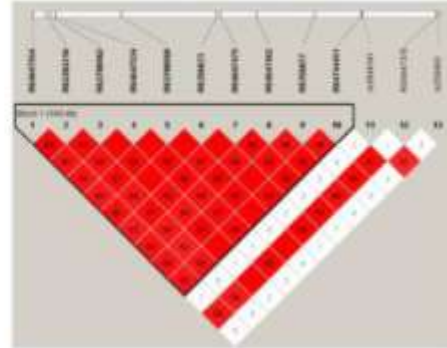

**Female Controls**

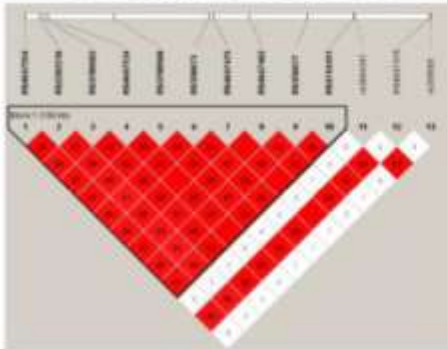

**Female Cases**

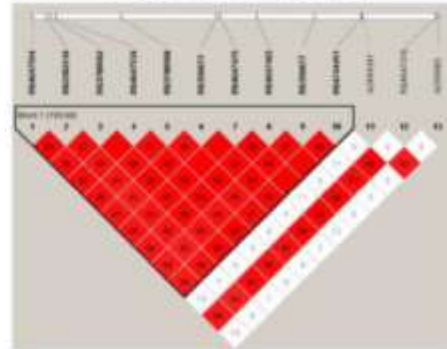

Supplement: 12929_2016_240_MOESM3_ESM.pdf [file 12929_2016_240_MOESM3_ESM.pdf]
